# Supplementary material for: Efficient carbonate synthesis under mild conditions through cycloaddition of carbon dioxide to oxiranes using a Zn(salphen) catalyst
Source: Royal Society of Chemistry journal article supplement (doi:10.1039/c000493f), 2010-01-01
Supplement: c000493f.pdf [file c000493f.pdf]

Supporting Information:

**Efficient carbonate synthesis under mild conditions through  
cycloaddition of carbon dioxide to oxiranes using a  
Zn(salphen) catalyst**

Antonello Decortes,<sup>†</sup> Marta Martínez Belmonte,<sup>†</sup> Jordi Benet-Buchholz<sup>†</sup> and Arjan W.  
Kleij<sup>\*,†,‡</sup>

<sup>†</sup>*Institute of Chemical Research of Catalonia (ICIQ), Av. Països Catalans 16, 43007,  
Tarragona, Spain, and* <sup>‡</sup>*Catalan Institute for Research and Advanced Studies (ICREA),  
Pg. Lluís Companys 23, 08010, Barcelona, Spain*

Content:

- Page S2: General catalytic procedure for the cycloaddition reaction of carbon dioxide to epoxides, and recycling experiment.
- Page S3: Crystallographic comments and details.
- Page S7: Synthesis and characterization of complex **5**.
- Page S8: General comments.
- Page S10: Synthesis details of Zn(salphen) complexes.

## General catalytic procedure for the cycloaddition reaction of carbon dioxide to epoxides, and recycling experiment.

The Zn(salphen) catalyst **2** (0.025 g,  $5.0 \times 10^{-5}$  mol) and (co-catalyst) NBu<sub>4</sub>I (0.018 g,  $5 \times 10^{-5}$  mol) were added in a two-necked round-bottomed flask under a gently flux of argon. Dry CH<sub>2</sub>Cl<sub>2</sub> (5.0 mL) and mesitylene (0.27 mL,  $2.0 \times 10^{-3}$  mol) were then added and the solution stirred until complete dissolution occurred. To this mixture the epoxide ( $2.0 \times 10^{-3}$  mol) was added and the solution transferred to a 25 mL stainless-steel reactor previously purged with argon. Three cycles of pressurisation and depressurisation of the reactor (with CO<sub>2</sub> at 5 bar) were carried out before finally stabilizing the pressure at 10 bar and the solution left stirring at 45°C for 18h. A sample of the solution was then analyzed by means of <sup>1</sup>H NMR spectroscopy (*d*<sub>6</sub>-DMSO) and the yield determined using mesitylene as an internal standard.

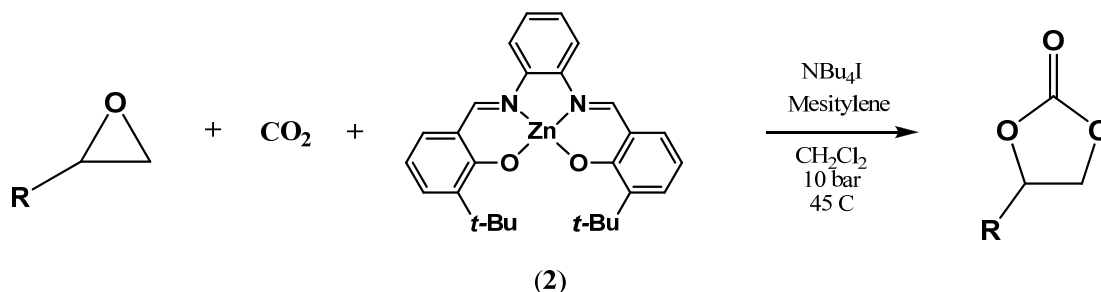

### Recycling experiment:

In a separate experiment the same reaction (see above) was carried out. After 18 h, the mixture was analyzed and the conversion of the cyclic carbonate determined at 84%. Then, the reaction mixture was carefully concentrated, and the residue extracted (6 × 2mL) with hexane (*the catalyst and co-catalyst are virtually insoluble in hexane as confirmed by NMR analysis of the combined hexane extracts*). To the residue of this extracted crude product was added a new batch of epoxyhexane dissolved in CH<sub>2</sub>Cl<sub>2</sub> (5.0 mL), after which the mixture was pressurized with CO<sub>2</sub> to 10 bar. A second run of 18 h was then performed and analyzed by <sup>1</sup>H NMR (*d*<sub>6</sub>-DMSO); the conversion of cyclic carbonate was determined at 82%.

## Crystallographic comments and details

*c*-Hexene oxide structure based on complex **1**:

Comments: Two of the *tert*-butyl groups of the complex are showing rotational disorder (three different orientations). Also the six membered ring of the ligand attached to the Zn atom is showing some disorder. Since the structure was taken at room temperature it was not possible to separate the disordered positions of the six membered ring. Crystals of this compound measured at 100K cracked after few minutes making a structure determination at this temperature extremely difficult. The structure collected at room temperature has an R1 value of 5.4 %.

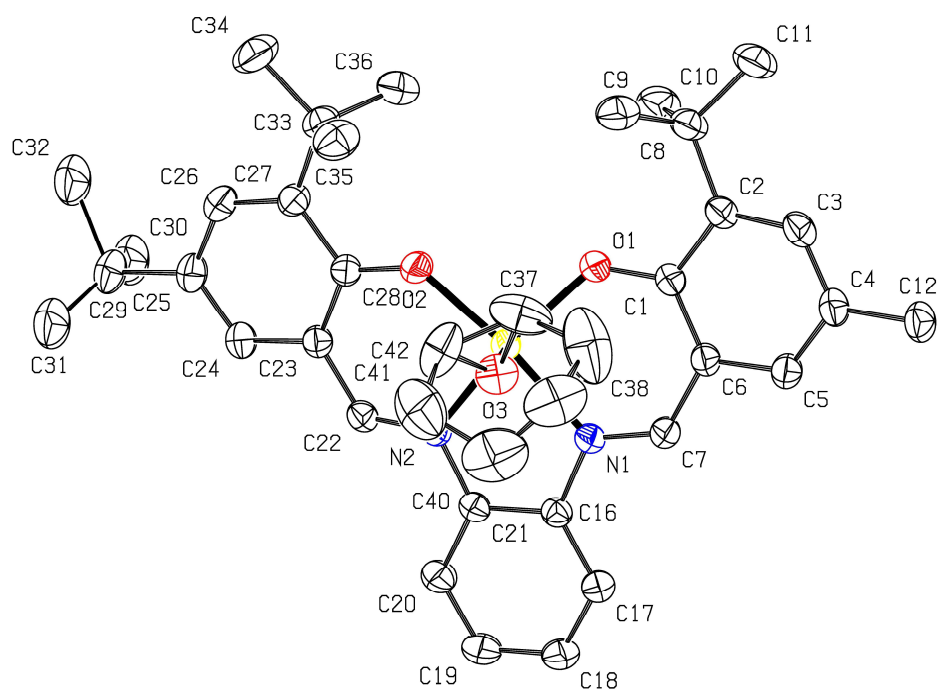

Figure S1. Other perspective view of the structure **1**·(*c*-hexene oxide). Disorder observed, co-crystallized solvent molecules and H-atoms are omitted for clarity.

Epoxyhexane oxide structure based on complex **1**:

Comments: The rest (i.e., ligand = epoxyhexane) attached to the Zn-atom is disordered in three orientations (50:25:25). Due to the disorder problems some of the atoms are showing large thermal ellipsoids. The structure has an R1 value of 5.3 %.

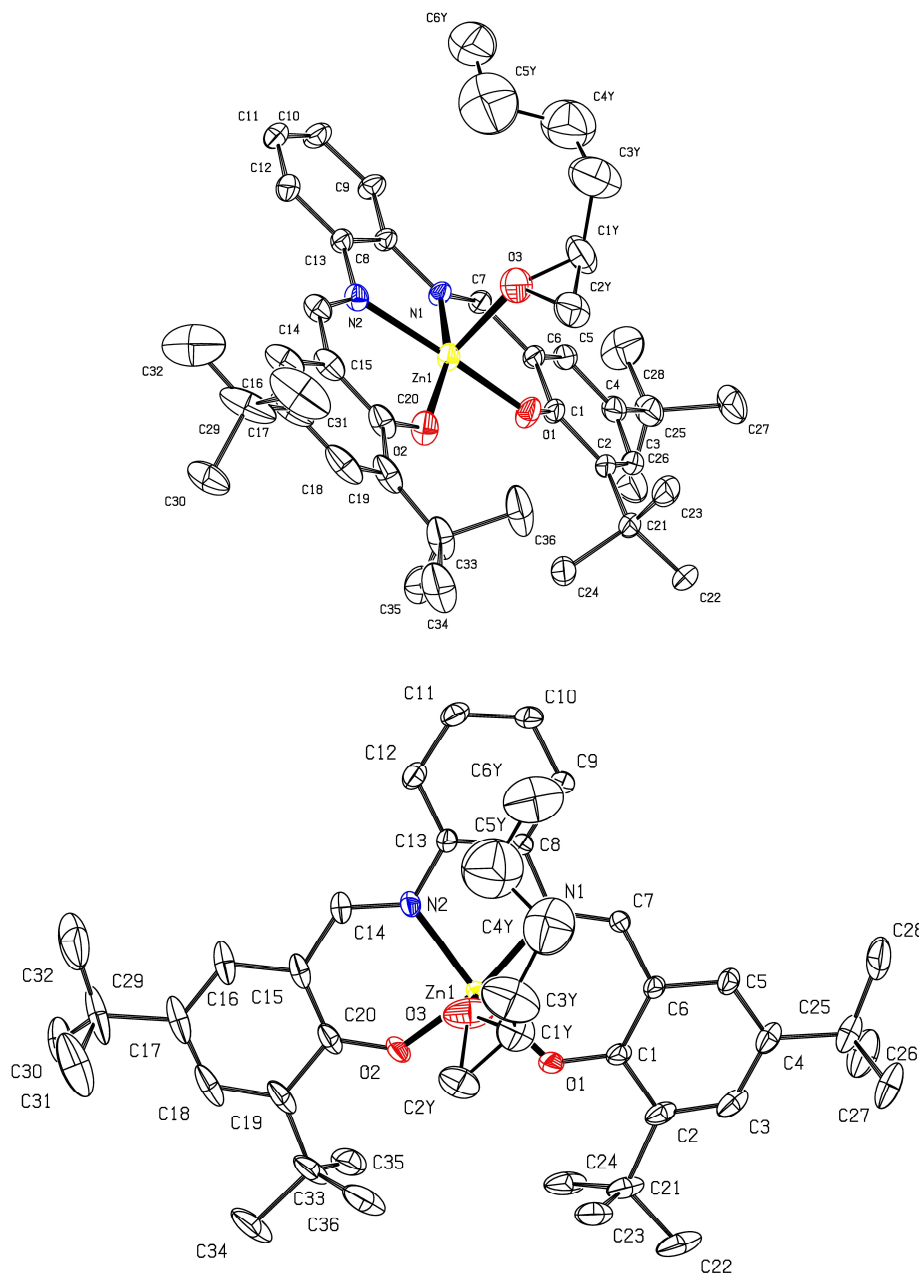

Figure S2. Some perspective views of the molecular structure of **1**-(epoxyhexane). Disorder, co-crystallized solvent molecules and H-atoms are omitted for clarity.

# Crystallographic summaries of **1**·(epoxyhexane) and **1**·(*c*-hexene oxide).

Table S1. Crystal data and structure refinement for **1**·(epoxyhexane).

|                                   |                                             |                             |
|-----------------------------------|---------------------------------------------|-----------------------------|
| Identification code               | AD3p21c                                     |                             |
| Empirical formula                 | C42 H58 N2 O3 Zn                            |                             |
| Formula weight                    | 704.27                                      |                             |
| Temperature                       | 100(2) K                                    |                             |
| Wavelength                        | 0.71073 Å                                   |                             |
| Crystal system                    | Monoclinic                                  |                             |
| Space group                       | P2(1)/c                                     |                             |
| Unit cell dimensions              | a = 12.9860(5) Å                            | $\alpha = 90.00^\circ$ .    |
|                                   | b = 25.1822(9) Å                            | $\beta = 94.087(2)^\circ$ . |
|                                   | c = 11.9067(5) Å                            | $\gamma = 90.00^\circ$ .    |
| Volume                            | 3883.8(3) Å <sup>3</sup>                    |                             |
| Z                                 | 4                                           |                             |
| Density (calculated)              | 1.204 Mg/m <sup>3</sup>                     |                             |
| Absorption coefficient            | 0.671 mm <sup>-1</sup>                      |                             |
| F(000)                            | 1512                                        |                             |
| Crystal size                      | 0.40 x 0.40 x 0.25 mm <sup>3</sup>          |                             |
| Theta range for data collection   | 1.57 to 35.02 °.                            |                             |
| Index ranges                      | -20 ≤ h ≤ 20, -40 ≤ k ≤ 40, -19 ≤ l ≤ 18    |                             |
| Reflections collected             | 17026                                       |                             |
| Independent reflections           | 13521 [R(int) = 0.0421 ]                    |                             |
| Completeness to theta = 35.02 °   | 0.995 %                                     |                             |
| Absorption correction             | Empirical                                   |                             |
| Max. and min. transmission        | 0.8502 and 0.7751                           |                             |
| Refinement method                 | Full-matrix least-squares on F <sup>2</sup> |                             |
| Data / restraints / parameters    | 17026 / 349 / 588                           |                             |
| Goodness-of-fit on F <sup>2</sup> | 1.074                                       |                             |
| Final R indices [I > 2σ(I)]       | R1 = 0.0527, wR2 = 0.1400                   |                             |
| R indices (all data)              | R1 = 0.0707, wR2 = 0.1549                   |                             |
| Largest diff. peak and hole       | 1.635 and -1.123 e.Å <sup>-3</sup>          |                             |

Table S2. Crystal data and structure refinement for **1**·(*c*-hexene oxide).

|                                   |                                             |                  |  |
|-----------------------------------|---------------------------------------------|------------------|--|
| Identification code               | AWK560RT_0m                                 |                  |  |
| Empirical formula                 | C42 H56 N2 O3 Zn                            |                  |  |
| Formula weight                    | 702.26                                      |                  |  |
| Temperature                       | 296(2) K                                    |                  |  |
| Wavelength                        | 0.71073 Å                                   |                  |  |
| Crystal system                    | Triclinic                                   |                  |  |
| Space group                       | P-1                                         |                  |  |
| Unit cell dimensions              | a = 12.0200(12) Å                           | α= 91.604(6) °.  |  |
|                                   | b = 12.9735(13) Å                           | β = 98.646(6) °. |  |
|                                   | c = 13.1293(14) Å                           | γ= 103.732(6) °. |  |
| Volume                            | 1962.0(3) Å <sup>3</sup>                    |                  |  |
| Z                                 | 2                                           |                  |  |
| Density (calculated)              | 1.189 Mg/m <sup>3</sup>                     |                  |  |
| Absorption coefficient            | 0.664 mm <sup>-1</sup>                      |                  |  |
| F(000)                            | 752                                         |                  |  |
| Crystal size                      | 0.40 x 0.40 x 0.30 mm <sup>3</sup>          |                  |  |
| Theta range for data collection   | 1.62 to 34.04 °.                            |                  |  |
| Index ranges                      | -18 <=h<=18 ,-20 <=k<=20 ,-20 <=l<=20       |                  |  |
| Reflections collected             | 15605                                       |                  |  |
| Independent reflections           | 10104 [R(int) = 0.0360 ]                    |                  |  |
| Completeness to theta =34.04 °    | 0.972 %                                     |                  |  |
| Absorption correction             | Empirical                                   |                  |  |
| Max. and min. transmission        | 0.8256 and 0.7771                           |                  |  |
| Refinement method                 | Full-matrix least-squares on F <sup>2</sup> |                  |  |
| Data / restraints / parameters    | 15605 / 102 / 474                           |                  |  |
| Goodness-of-fit on F <sup>2</sup> | 1.056                                       |                  |  |
| Final R indices [I>2sigma(I)]     | R1 = 0.0601 , wR2 = 0.1801                  |                  |  |
| R indices (all data)              | R1 = 0.0914 , wR2 = 0.2016                  |                  |  |
| Largest diff. peak and hole       | 0.716 and -0.664 e.Å <sup>-3</sup>          |                  |  |

## Synthesis and characterization of complex **5**.

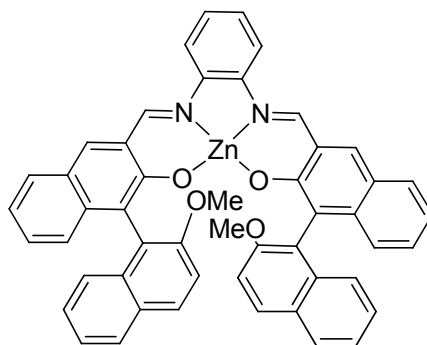

1,2-Phenylenediamine (20 mg, 0.18 mmol), (*S*)-2-hydroxy-2'-methoxy-1,1'-binaphthyl-3-carbaldehyde (63 mg, 0.39 mmol),<sup>1</sup> Zn(OAc)<sub>2</sub>·2H<sub>2</sub>O (45 mg, 0.20 mmol) were placed in a round bottom flask. MeOH (20 mL) was added and the resulting suspension was heated until it became a clear solution. Then, 3-4 drops of pyridine were added and the solution stirred overnight at room temperature. The solid that had precipitated was collected by filtration and recrystallized from CHCl<sub>3</sub>/MeOH to give **5** as a bright orange solid (87.9 mg, 60%). <sup>1</sup>H NMR (400 MHz, [D<sub>6</sub>]DMSO): δ = 9.41 (s, 2H, CH=N), 8.36 (d, 2H, *J* = 4.6 Hz, Pyr-H<sub>ortho</sub>), 8.15 (s, 2H, ArH), 8.11 (d, 2H, *J* = 8.74 Hz, ArH), 8.05 (m, 2H, ArH), 8.02 (s, 1H, ArH), 7.99 (d, 2H, *J* = 8.7 Hz, ArH), 7.76 (t, 1H, *J* = 7.8 Hz, Pyr-H), 7.71 (d, 2H, *J* = 7.8 Hz, ArH), 7.50 (m, 2H, ArH), 7.29 (m, 4H, ArH+Pyr-H), 7.24 (m, 2H, ArH), 7.09 (m, 4H, ArH), 7.01 (m, 2H, ArH), 6.95 (m, 2H, ArH), 6.69 (d, 2H, *J* = 8.7 Hz, ArH), 2.92 (s, 6H, OMe); MS (MALDI<sup>+</sup>, pyrene): *m/z* = 791.3 (M+H)<sup>+</sup>. Anal. calcd. for C<sub>50</sub>H<sub>34</sub>N<sub>2</sub>O<sub>4</sub>Zn·CHCl<sub>3</sub>·Pyr: C 68.83, H 3.89, N 4.38. Found: C 68.61, H 3.65, N 4.47. The presence of 1 equiv of pyridine was confirmed by <sup>1</sup>H NMR.

<sup>1</sup> The chiral binaphthaldehyde was prepared according to a previously reported procedures, see: a) A. R. van Doorn, D. J. Rushton, M. Bos, W. Verboom, D. N. Reinhoudt, *Recl. Trav. Chim. Pay-Bas.* **1992**, *111*, 415; b) L. Jin, Y. Huang, H. Jing, T. Chang, P. Yan, *Tetrahedron: Asymmetry* **2008**, *19*, 1947.

The aromatic region of the  $^1\text{H}$  NMR ( $d_6$ -DMSO) of **5** is shown below:

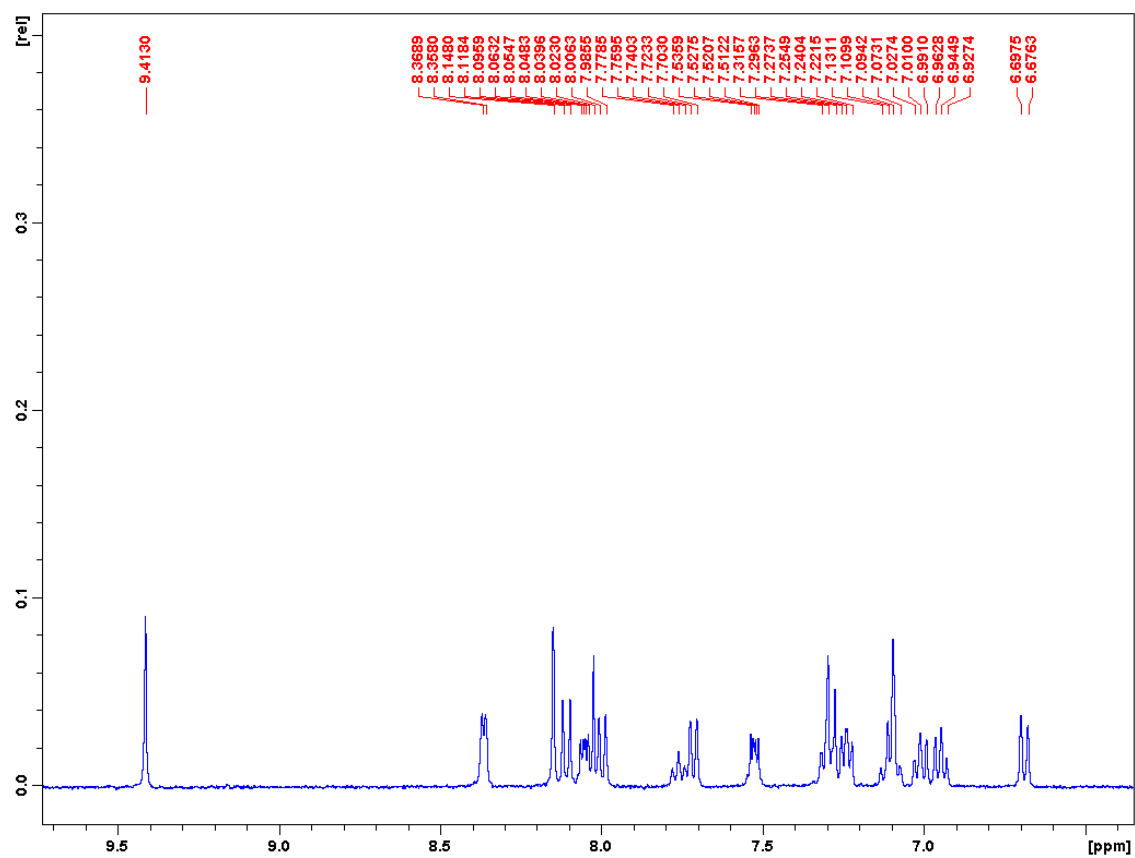



**General comments:**

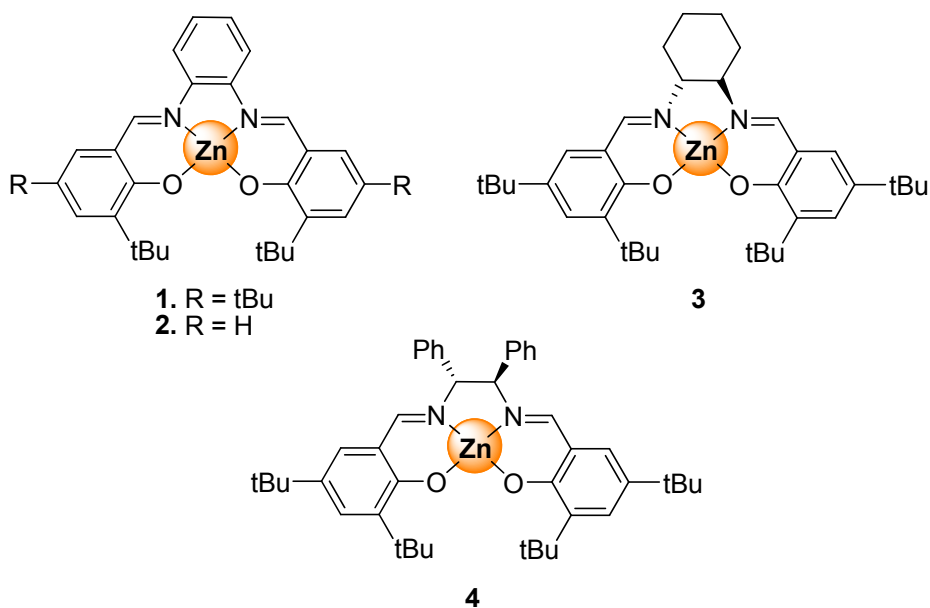

Complexes **1-2**,<sup>2</sup> **3**,<sup>3</sup> and **4**<sup>4</sup> were prepared according to literature procedures.

<sup>2</sup> A. W. Kleij, D. M. Tooke, M. Kuil, M. Lutz, A. L. Spek, J. N. H. Reek, *Chem.–Eur. J.* **2005**, *11*, 4743-4750.

<sup>3</sup> G. A. Morris, H. Zhou, C. L. Stern, S.T. Nguyen, *Inorg. Chem.* **2001**, *40*, 3222.

<sup>4</sup> Cozzi reported the *in situ* preparation of this Zn derivative using dialkyl-Zn reagents. See: P. G. Cozzi, *Angew. Chem. Int. Ed.* **2003**, *42*, 2895. We found that a simple salt such as Zn(OAc)<sub>2</sub>·2H<sub>2</sub>O is also effective for the synthesis of **4**.

## Synthesis details of Zn(salphen) complexes

*The Zn-salphen complexes are generally easily prepared by combination of the respective salicylaldehyde, o-phenylenediamine and Zn(OAc)<sub>2</sub>·2H<sub>2</sub>O in a one-pot procedure: all components can be commercially purchased and are relatively cheap. A typical procedure for complex **1** is given below:*<sup>5</sup>

To a solution of *o*-phenylenediamine (1.26 g, 11.65 mmol) and 3,5-di-*tert*-butylsalicylaldehyde (5.79 g, 24.71 mmol) in MeOH (150 mL) was added solid Zn(OAc)<sub>2</sub>·2H<sub>2</sub>O (2.69 g, 12.26 mmol). The resultant orange solution was stirred for 2 h after which the obtained suspension was filtered to furnish a bright orange solid (7.06 g, 11.10 mmol, 95%). The isolated yield of **1** generally is in the range 90-98%. The product can be easily recrystallized from hot CH<sub>3</sub>CN to afford analytically pure **1**. The synthesis of complex **2** can be carried out in a similar fashion with isolated yields exceeding 90%.

---

<sup>5</sup> a) See reference 2 of this ESI. See also: b) A. W. Kleij, D. M. Tooke, M. Lutz, A. L. Spek, J. N. H. Reek, *Eur. J. Inorg. Chem.* **2005**, 4626. c) E. C. Escudero-Adán, J. Benet-Buchholz, A. W. Kleij, *Eur. J. Inorg. Chem.* **2009**, 3562.
